# Supplementary material for: Wound Healing: In Vitro and In Vivo Evaluation of a Bio-Functionalized Scaffold Based on Hyaluronic Acid and Platelet-Rich Plasma in Chronic Ulcers
Source: PubMed Central journal article supplement (PMC6780765; doi:10.3390/jcm8091486), 2019-09-18
Supplement: jcm-08-01486-s001.pdf [file jcm-08-01486-s001.pdf]

| Patient | Age | Etiology       | Depth (mm) | Wound size (cm2) | Anatomical site  | Comorbidity           | Complication |
|---------|-----|----------------|------------|------------------|------------------|-----------------------|--------------|
| P1      | 80  | Diabetic       | 1          | 7x4              | Foot             | Cardiological disease | Infection    |
| P2      | 72  | Vascular       | 0,5        | 10x5             | Leg              | Hypertension          | No           |
| P3      | 76  | Diabetic       | 0,3        | 2x1,5            | Fingers          | Cardiological disease | No           |
| P4      | 30  | post-traumatic | 2          | 15x4             | Leg              | No                    | No           |
| P5      | 87  | Vascular       | 0,7        | 7,5x4            | Leg and Foot     | Neurological disease  | No           |
| P6      | 54  | Diabetic       | 2,3        | 3x2              | Leg              | Hypertension          | No           |
| P7      | 56  | Vascular       | 1,4        | 9x7              | Leg              | Dislipidemy           | No           |
| P8      | 32  | post-traumatic | 1,3        | 4,5x2            | Thigh and Foot   | No                    | No           |
| P9      | 75  | Diabetic       | 2,7        | 5x3              | Leg              | Hypertension          | No           |
| P10     | 48  | post-traumatic | 1,5        | 6,5x4            | Thigh            | No                    | No           |
| P11     | 67  | Diabetic       | 1,2        | 15x8             | Foot and fingers | No                    | No           |
| P12     | 70  | Diabetic       | 0,8        | 1,5x1            | Leg              | Cardiological disease | No           |
| P13     | 36  | post-traumatic | 2          | 7x4              | Thigh            | No                    | No           |
| P14     | 30  | post-traumatic | 2,1        | 13x5             | Leg and Thigh    | No                    | No           |
| P15     | 80  | vascular       | 2,4        | 6x3              | Leg              | Renal disease         | No           |
| P16     | 55  | Diabetic       | 1          | 8x5              | Foot             | Hypertension          | No           |
| P17     | 85  | post-traumatic | 1,7        | 5x5              | Thigh and Foot   | Cardiological disease | No           |
| P18     | 60  | Vascular       | 0,6        | 13x5             | Leg              | No                    | No           |
| P19     | 79  | Diabetic       | 1,3        | 6x4              | Foot             | Renal disease         | Infection    |
| P20     | 43  | post-traumatic | 2,3        | 11x7             | Knees            | No                    | No           |
| P21     | 39  | post-traumatic | 1,7        | 8x8              | Leg              | No                    | No           |
| P22     | 76  | Diabetic       | 1,5        | 9x4              | Thigh            | Renal disease         | No           |
| P23     | 62  | Vascular       | 0,5        | 5x6              | Leg              | Cardiological disease | No           |
| P24     | 54  | post-traumatic | 1          | 7x4              | Leg and Knees    | Respiratory disease   | No           |
| P25     | 83  | Diabetic       | 0,8        | 8x5              | Leg and Foot     | Neurological disease  | No           |
| P26     | 78  | Diabetic       | 2,4        | 3x2              | Leg              | No                    | Infection    |
| P27     | 57  | post-traumatic | 1          | 6x6              | Foot             | Hypertension          | No           |
| P28     | 78  | post-traumatic | 2,3        | 9x4              | Leg              | Renal disease         | No           |
| P29     | 74  | Vascular       | 1          | 15x7             | Leg              | Respiratory disease   | No           |
| P30     | 84  | Diabetic       | 0,7        | 3x5              | Thigh and Foot   | Cardiological disease | No           |
| P31     | 54  | Diabetic       | 1,2        | 6x3,5            | Leg              | Cardiological disease | No           |
| P32     | 35  | post-traumatic | 1,8        | 7x8              | Leg              | No                    | No           |
| P33     | 46  | Vascular       | 0,8        | 11x7             | Leg              | Dislipidemy           | No           |
| P34     | 41  | post-traumatic | 2          | 12x4             | Tigh             | No                    | No           |
| P35     | 87  | Vascular       | 1          | 7x10             | Foot             | Cardiological disease | No           |
| P36     | 78  | Diabetic       | 1,70       | 15x2             | Leg              | Cardiological disease | No           |
| P37     | 68  | Diabetic       | 1,15       | 3x22             | Leg              | No                    | No           |
| P38     | 25  | post-traumatic | 0,64       | 1,5x60           | Thigh            | Neurological disease  | No           |
| P39     | 49  | post-traumatic | 1,3        | 25x2             | Leg and Thigh    | Hypertension          | No           |
| P40     | 76  | Vascular       | 2,5        | 15x3             | Leg              | Dislipidemy           | No           |
| P41     | 69  | Vascular       | 1,3        | 12x4             | Foot             | No                    | No           |
| P42     | 82  | Vascular       | 0,7        | 1,5x7            | Thigh and Foot   | Hypertension          | No           |
| P43     | 87  | Vascular       | 2,1        | 2,5x12           | Leg              | No                    | No           |
| P44     | 73  | Diabetic       | 1,2        | 4x7              | Foot             | No                    | No           |
| P45     | 58  | Diabetic       | 0,6        | 63x1             | Knees            | Cardiological disease | No           |
| P46     | 72  | Diabetic       | 1,8        | 48x1             | Leg              | Hypertension          | No           |
| P47     | 75  | Vascular       | 2,5        | 10x5             | Thigh            | No                    | No           |
| P48     | 82  | Vascular       | 2,1        | 23x3             | Leg              | No                    | No           |
| P49     | 69  | Diabetic       | 1,4        | 14x3             | Leg and Knees    | Renal disease         | No           |
| P50     | 77  | Vascular       | 0,9        | 7x4              | Leg and Foot     | Hypertension          | No           |
| P51     | 65  | Vascular       | 2,3        | 10x5             | Leg              | Cardiological disease | No           |
| P52     | 48  | post-traumatic | 2,4        | 2x1,5            | Foot             | No                    | No           |
| P53     | 65  | vascular       | 1          | 15x4             | Leg              | Renal disease         | No           |
| P54     | 67  | Vascular       | 0,5        | 7,5x4            | Leg              | No                    | No           |
| P55     | 84  | Vascular       | 0,7        | 3x2              | Thigh and Foot   | No                    | No           |
| P56     | 75  | Vascular       | 1          | 12x9             | Leg              | Renal disease         | No           |
| P57     | 72  | Vascular       | 1,2        | 4,5x2            | Leg              | Cardiological disease | No           |
| P58     | 73  | vascular       | 0,65       | 5x3              | Leg              | Respiratory disease   | No           |
| P59     | 69  | vascular       | 2          | 6,5x4            | Tigh             | Neurological disease  | No           |
| P60     | 67  | Diabetic       | 1,4        | 12x5             | Foot             | No                    | No           |
| P61     | 64  | Diabetic       | 2,1        | 1,5x1            | Leg              | Hypertension          | No           |
| P62     | 67  | vascular       | 1,7        | 16x6             | Fingers          | Renal disease         | No           |
| P63     | 71  | vascular       | 2,4        | 7x4              | Leg              | Respiratory disease   | Infection    |
| P64     | 66  | post-traumatic | 1,1        | 13x5             | Leg and Foot     | Cardiological disease | No           |
| P65     | 43  | vascular       | 1,3        | 6x3              | Leg              | Cardiological disease | No           |
| P66     | 67  | vascular       | 2,0        | 8x5              | Leg              | No                    | No           |
| P67     | 67  | vascular       | 0,9        | 5x5              | Thigh and Foot   | Dislipidemy           | No           |
| P68     | 72  | Diabetic       | 1,6        | 13x5             | Leg              | No                    | No           |
| P69     | 84  | Diabetic       | 1          | 6x4              | Thigh            | Cardiological disease | No           |
| P70     | 73  | Diabetic       | 0,5        | 11x7             | Foot and fingers | Renal disease         | No           |
| P71     | 66  | vascular       | 2,3        | 14x2             | Leg              | Hypertension          | No           |
| P72     | 63  | post-traumatic | 0,8        | 9x4              | Leg              | Cardiological disease | No           |
| P73     | 71  | vascular       | 1,45       | 5x6              | Thigh            | No                    | No           |
| P74     | 80  | vascular       | 1,3        | 7x4              | Leg and Thigh    | Renal disease         | No           |
| P75     | 65  | post-traumatic | 1          | 8x5              | Leg              | No                    | No           |
| P76     | 73  | vascular       | 0,5        | 3x2              | Foot             | No                    | No           |
| P77     | 66  | post-traumatic | 0,7        | 6x6              | Thigh and Foot   | Renal disease         | No           |
| P78     | 74  | vascular       | 1          | 9x4              | Leg              | Cardiological disease | No           |
| P79     | 72  | Diabetic       | 1,2        | 15x7             | Foot             | Respiratory disease   | No           |
| P80     | 73  | Vascular       | 0,65       | 6x8              | Knees            | Neurological disease  | No           |
| P81     | 89  | Diabetic       | 0,6        | 2x7              | Leg              | No                    | No           |
| P82     | 65  | post-traumatic | 1,8        | 3x4              | Thigh            | Hypertension          | No           |

|      |    |                |      |        |                  |                       |    |
|------|----|----------------|------|--------|------------------|-----------------------|----|
| P83  | 62 | Vascular       | 2,5  | 12x5   | Leg              | Renal disease         | No |
| P84  | 67 | Diabetic       | 2,1  | 6x9    | Leg and Knees    | Respiratory disease   | No |
| P85  | 74 | Vascular       | 1,4  | 4x8    | Leg and Foot     | Cardiological disease | No |
| P86  | 78 | post-traumatic | 0,9  | 3x6    | Leg              | Cardiological disease | No |
| P87  | 64 | Diabetic       | 2,5  | 11x3   | Foot             | No                    | No |
| P88  | 68 | post-traumatic | 1,7  | 2x12   | Thigh            | Dislipidemy           | No |
| P89  | 84 | Diabetic       | 0,6  | 14x2   | Leg              | No                    | No |
| P90  | 77 | Diabetic       | 2    | 18x2   | Leg              | Cardiological disease | No |
| P91  | 63 | Vascular       | 1,9  | 5x7    | Thigh            | Cardiological disease | No |
| P92  | 54 | post-traumatic | 0,45 | 16x3   | Leg and Thigh    | No                    | No |
| P93  | 48 | post-traumatic | 1,6  | 15x2   | Leg              | Neurological disease  | No |
| P94  | 68 | vascular       | 2,3  | 6x9    | Foot             | Hypertension          | No |
| P95  | 76 | Diabetic       | 1,3  | 3x8    | Thigh and Foot   | Dislipidemy           | No |
| P96  | 68 | post-traumatic | 0,7  | 6x4    | Leg              | No                    | No |
| P97  | 78 | Vascular       | 2,3  | 12x6   | Foot             | Hypertension          | No |
| P98  | 48 | Diabetic       | 1,4  | 19x3   | Knees            | No                    | No |
| P99  | 67 | post-traumatic | 2,1  | 3x21   | Leg              | No                    | No |
| P100 | 63 | post-traumatic | 0,6  | 6x12   | Thigh            | Cardiological disease | No |
| P101 | 78 | Diabetic       | 2    | 9x4    | Leg              | Hypertension          | No |
| P102 | 89 | Vascular       | 0,85 | 5x6    | Leg and Knees    | No                    | No |
| P103 | 81 | post-traumatic | 1,9  | 7x4    | Leg and Foot     | No                    | No |
| P104 | 76 | Diabetic       | 2,4  | 8x5    | Leg              | Renal disease         | No |
| P105 | 72 | Diabetic       | 1,6  | 3x2    | Foot             | Hypertension          | No |
| P106 | 64 | post-traumatic | 0,75 | 6x6    | Leg              | Cardiological disease | No |
| P107 | 75 | post-traumatic | 1,5  | 9x4    | Leg              | No                    | No |
| P108 | 68 | Vascular       | 1,8  | 15x7   | Thigh and Foot   | Renal disease         | No |
| P109 | 60 | Diabetic       | 2,4  | 6x8    | Leg              | No                    | No |
| P110 | 54 | Diabetic       | 2,5  | 2x7    | Leg              | No                    | No |
| P111 | 33 | post-traumatic | 0,55 | 3x4    | Leg and Knees    | Renal disease         | No |
| P112 | 74 | Vascular       | 1,6  | 12x5   | Leg and Foot     | Cardiological disease | No |
| P113 | 81 | post-traumatic | 2,1  | 6x9    | Leg              | Respiratory disease   | No |
| P114 | 54 | Vascular       | 1,6  | 4x8    | Foot             | Neurological disease  | No |
| P115 | 52 | Diabetic       | 2,3  | 3x6    | Leg              | Hypertension          | No |
| P116 | 63 | Diabetic       | 1,6  | 11x3   | Leg              | Renal disease         | No |
| P117 | 67 | post-traumatic | 1,9  | 2x12   | Thigh and Foot   | Respiratory disease   | No |
| P118 | 43 | post-traumatic | 2,2  | 14x2   | Leg              | Cardiological disease | No |
| P119 | 70 | Vascular       | 0,95 | 18x2   | Leg              | Cardiological disease | No |
| P120 | 75 | Vascular       | 1,55 | 5x7    | Leg              | No                    | No |
| P121 | 62 | Vascular       | 0,6  | 37x2   | Tigh             | Dislipidemy           | No |
| P122 | 75 | Vascular       | 0,8  | 14x5   | Foot             | No                    | No |
| P123 | 74 | Diabetic       | 1,9  | 10x5   | Leg              | Cardiological disease | No |
| P124 | 85 | Diabetic       | 2,6  | 23x3   | Fingers          | Renal disease         | No |
| P125 | 81 | post-traumatic | 2,8  | 3x17   | Leg              | Hypertension          | No |
| P126 | 64 | vascular       | 1    | 7x4    | Leg and Foot     | Cardiological disease | No |
| P127 | 42 | vascular       | 0,6  | 10x5   | Leg              | No                    | No |
| P128 | 67 | post-traumatic | 1,6  | 2x1,5  | Leg              | Renal disease         | No |
| P129 | 54 | vascular       | 0,7  | 15x4   | Thigh and Foot   | No                    | No |
| P130 | 81 | post-traumatic | 1,9  | 7,5x4  | Leg              | No                    | No |
| P131 | 87 | vascular       | 0,5  | 3x2    | Thigh            | Renal disease         | No |
| P132 | 67 | Diabetic       | 1,9  | 15x7   | Foot and fingers | Cardiological disease | No |
| P133 | 63 | Vascular       | 2,4  | 6x8    | Leg              | Respiratory disease   | No |
| P134 | 57 | Diabetic       | 1,6  | 2x7    | Leg              | Neurological disease  | No |
| P135 | 74 | post-traumatic | 0,75 | 3x4    | Thigh            | No                    | No |
| P136 | 73 | Vascular       | 1,5  | 11x4   | Leg and Thigh    | Hypertension          | No |
| P137 | 79 | Diabetic       | 1,8  | 6x9    | Leg              | Renal disease         | No |
| P138 | 80 | Vascular       | 2,4  | 4x8    | Foot             | Respiratory disease   | No |
| P139 | 49 | post-traumatic | 2,5  | 3x6    | Thigh            | Cardiological disease | No |
| P140 | 67 | Diabetic       | 0,55 | 11x3   | Leg              | Cardiological disease | No |
| P141 | 54 | post-traumatic | 1,6  | 2x12   | Leg and Knees    | No                    | No |
| P142 | 77 | Diabetic       | 2,1  | 14x2   | Leg and Foot     | Dislipidemy           | No |
| P143 | 70 | Diabetic       | 1,6  | 18x2   | Leg              | No                    | No |
| P144 | 63 | Vascular       | 2,3  | 5x7    | Foot             | Cardiological disease | No |
| P145 | 85 | post-traumatic | 1,6  | 32x2   | Thigh            | Cardiological disease | No |
| P146 | 86 | post-traumatic | 1,9  | 1x45   | Leg              | No                    | No |
| P147 | 64 | vascular       | 2,2  | 8x5    | Leg              | Neurological disease  | No |
| P148 | 74 | Diabetic       | 0,95 | 5x5    | Thigh            | Hypertension          | No |
| P149 | 82 | post-traumatic | 1,55 | 13x5   | Leg and Thigh    | Dislipidemy           | No |
| P150 | 66 | Vascular       | 1,3  | 3x15   | Leg              | No                    | No |
| P151 | 78 | Diabetic       | 2,5  | 11x7   | Foot             | Hypertension          | No |
| P152 | 73 | post-traumatic | 1,3  | 14x2   | Thigh and Foot   | No                    | No |
| P153 | 74 | post-traumatic | 0,7  | 9x4    | Leg              | No                    | No |
| P154 | 72 | Diabetic       | 2,1  | 5x6    | Foot             | Cardiological disease | No |
| P155 | 47 | Vascular       | 1,2  | 7x4    | Knees            | Hypertension          | No |
| P156 | 45 | post-traumatic | 0,6  | 8x5    | Leg              | No                    | No |
| P157 | 61 | Diabetic       | 1,8  | 3x2    | Thigh            | No                    | No |
| P158 | 27 | Diabetic       | 2,5  | 6x6    | Leg              | Dislipidemy           | No |
| P159 | 84 | post-traumatic | 2,1  | 9x4    | Leg and Knees    | No                    | No |
| P160 | 75 | post-traumatic | 1,4  | 15x7   | Leg and Foot     | Cardiological disease | No |
| P161 | 49 | Vascular       | 0,9  | 6x8    | Leg              | Renal disease         | No |
| P162 | 73 | Diabetic       | 2,3  | 2x7    | Foot             | Hypertension          | No |
| P163 | 81 | Diabetic       | 2,4  | 3x4    | Leg              | Cardiological disease | No |
| P164 | 20 | post-traumatic | 1    | 12x5   | Leg              | No                    | No |
| P165 | 78 | Vascular       | 0,5  | 5x8    | Thigh and Foot   | Renal disease         | No |
| P166 | 73 | Vascular       | 0,7  | 7x3    | Leg              | No                    | No |
| P167 | 73 | post-traumatic | 2,3  | 25x2,5 | Leg              | No                    | No |
| P168 | 88 | vascular       | 1,6  | 3x14   | Leg              | Renal disease         | No |
| P169 | 25 | Vascular       | 1,9  | 5x8    | Leg              | Cardiological disease | No |

|      |    |                |      |       |                  |                       |    |
|------|----|----------------|------|-------|------------------|-----------------------|----|
| P170 | 64 | Vascular       | 2,2  | 4x7   | Leg              | Respiratory disease   | No |
| P171 | 33 | Vascular       | 0,95 | 3x9   | Tigh             | Neurological disease  | No |
| P172 | 74 | Vascular       | 1,55 | 12x4  | Foot             | No                    | No |
| P173 | 44 | vascular       | 1,3  | 8x5   | Leg              | Hypertension          | No |
| P174 | 27 | vascular       | 2,5  | 3x2   | Fingers          | Renal disease         | No |
| P175 | 69 | Diabetic       | 1,3  | 3x8   | Leg              | Respiratory disease   | No |
| P176 | 72 | Diabetic       | 0,7  | 9x4   | Leg and Foot     | Cardiological disease | No |
| P177 | 51 | vascular       | 2,1  | 11x6  | Leg              | Cardiological disease | No |
| P178 | 64 | vascular       | 1,2  | 6x8   | Leg              | No                    | No |
| P179 | 34 | post-traumatic | 0,6  | 2x7   | Thigh and Foot   | Dislipidemy           | No |
| P180 | 87 | vascular       | 1,54 | 3x4   | Leg              | No                    | No |
| P181 | 78 | vascular       | 0,7  | 11x3  | Thigh            | Cardiological disease | No |
| P182 | 62 | vascular       | 1,3  | 7x5,5 | Foot and fingers | Cardiological disease | No |
